# Supplementary material for: Study on the perception of orthodontic treatment according to age: A questionnaire survey
Source: PubMed Central journal article supplement — Korean J Orthod. 2017 May 26;47(4):215–21. doi: 10.4041/kjod.2017.47.4.215 (PMC5466903; doi:10.4041/kjod.2017.47.4.215), 2017-05-26
Supplement: kjod-47-215-s001.pdf [file kjod-47-215-s001.pdf]

**Supplement 1.** Summary of the questionnaire

---

 Have you ever thought of receiving orthodontic treatment?

Yes (    ), No (    )

If YES, please answer the two questions below.

---

 Question 1: Reasons why you have thought of receiving orthodontic treatment

(Select all that apply, in order of importance)

1 (    ) → 2 (    ) → 3 (    )

- 
- |                                   |                                      |
|-----------------------------------|--------------------------------------|
| ① Lip protrusion                  | ② Tooth tipping after extraction     |
| ③ Malaligned tooth                | ④ Unesthetic                         |
| ⑤ Prognathism                     | ⑥ Dentist's recommendation           |
| ⑦ Asymmetry                       | ⑧ Friends/family receiving treatment |
| ⑨ More crowding than when younger | ⑩ TMJ disorder                       |
| ⑪ Tooth longer than when younger  | ⑫ Hard to chew                       |
| ⑬ Spacing between teeth           | ⑭ Others                             |
- 

Question 2: Reasons why you have not received orthodontic treatment yet

(Select all that apply, in order of importance)

1 (    ) → 2 (    ) → 3 (    )

- 
- |                             |                                                 |
|-----------------------------|-------------------------------------------------|
| ① Treatment fee             | ② Time                                          |
| ③ Pain                      | ④ Draws attention                               |
| ⑤ Appliance too conspicuous | ⑥ Underlying medical history                    |
| ⑦ Age (too old)             | ⑧ Periodontal complications                     |
| ⑨ More loss than gain       | ⑩ Peer advice (Family, friends, dentists, etc.) |
-
